# Supplementary material for: Assessment of Racial Bias within the Risk Analysis Index of Frailty
Source: PubMed Central journal article supplement — Ann Surg Open. 2024 Sep 25;5(4):e490. doi: 10.1097/AS9.0000000000000490 (PMC11661760; doi:10.1097/as9.0000000000000490), 2024-09-25

## **Supplemental Digital Content**

**Supplemental Table 1. Measures of Predictive Performance between Black and White cases for the threshold of optimal sensitivity and specificity (VASQIP, RAI 26, 3.5%)**

**Supplemental Table 2. Measures of Predictive Performance between Black and White cases for the threshold of detectable frailty (NSQIP, RAI 30, 2.3% predicted 30-day mortality)**

**Supplemental Figure 1. Comparison of ROC curves between Black and White cases in the RAI<sub>Base</sub> (NSQIP)**

**Supplemental Table 1. Measures of Predictive Performance between Black and White cases for the threshold of optimal sensitivity and specificity (VASQIP, RAI 26, 3.5%)**

|                                  |       | Bias Assessment     |                         |                        |                     | Comparative Model Performance     |                                 |                              |
|----------------------------------|-------|---------------------|-------------------------|------------------------|---------------------|-----------------------------------|---------------------------------|------------------------------|
|                                  |       | RAI <sub>Base</sub> | RAI <sub>Balanced</sub> | RAI <sub>Age-adj</sub> | RAI <sub>Fair</sub> | $\Delta$ from RAI <sub>Base</sub> |                                 |                              |
|                                  |       | Statistic           | Statistic               | Statistic              | Statistic           | $\Delta$ RAI <sub>Balanced</sub>  | $\Delta$ RAI <sub>Age-adj</sub> | $\Delta$ RAI <sub>Fair</sub> |
| Accuracy                         | Black | 0.829               | 0.823                   | 0.803                  | 0.765               | -0.6%                             | -2.6%                           | -6.4%                        |
|                                  | White | 0.794               | 0.786                   | 0.801                  | 0.648               | -0.8%                             | 0.7%                            | -14.6%                       |
|                                  | Bias  | 3.5%                | 3.7%                    | 0.2%                   | 11.7%               | 0.2%                              | -3.3%                           | 8.2%                         |
| Balanced Accuracy                | Black | 0.783               | 0.782                   | 0.783                  | 0.693               | -0.1%                             | 0.0%                            | -9.0%                        |
|                                  | White | 0.762               | 0.76                    | 0.761                  | 0.68                | -0.2%                             | -0.1%                           | -8.2%                        |
|                                  | Bias  | 2.1%                | 2.2%                    | 2.2%                   | 1.3%                | 0.1%                              | 0.1%                            | -0.8%                        |
| True Positive Rate (Sensitivity) | Black | 0.733               | 0.737                   | 0.762                  | 0.616               | 0.4%                              | 2.9%                            | -11.7%                       |
|                                  | White | 0.727               | 0.733                   | 0.718                  | 0.714               | 0.6%                              | -0.9%                           | -1.3%                        |
|                                  | Bias  | 0.6%                | 0.4%                    | 4.4%                   | -9.8%               | -0.2%                             | 3.8%                            | -10.4%                       |
| True Negative Rate (Specificity) | Black | 0.833               | 0.827                   | 0.804                  | 0.771               | -0.6%                             | -2.9%                           | -6.2%                        |
|                                  | White | 0.797               | 0.788                   | 0.804                  | 0.645               | -0.9%                             | 0.7%                            | -15.2%                       |
|                                  | Bias  | 3.6%                | 3.9%                    | 0.0%                   | 12.6%               | 0.3%                              | -3.6%                           | 9.0%                         |
| False Positive Rate              | Black | 0.167               | 0.173                   | 0.196                  | 0.229               | 0.6%                              | 2.9%                            | 6.2%                         |
|                                  | White | 0.203               | 0.212                   | 0.196                  | 0.355               | 0.9%                              | -0.7%                           | 15.2%                        |
|                                  | Bias  | 3.6%                | 3.9%                    | 0.0%                   | 12.6%               | 0.3%                              | -3.6%                           | 9.0%                         |
| False Negative Rate              | Black | 0.267               | 0.263                   | 0.238                  | 0.384               | -0.4%                             | -2.9%                           | 11.7%                        |
|                                  | White | 0.273               | 0.267                   | 0.282                  | 0.286               | -0.6%                             | 0.9%                            | 1.3%                         |
|                                  | Bias  | 0.6%                | 0.4%                    | 4.4%                   | -9.8%               | -0.2%                             | 3.8%                            | -10.4%                       |
| F1 score                         | Black | 0.242               | 0.237                   | 0.223                  | 0.163               | -0.5%                             | -1.9%                           | -7.9%                        |
|                                  | White | 0.206               | 0.2                     | 0.209                  | 0.129               | -0.6%                             | 0.3%                            | -7.7%                        |
|                                  | Bias  | 3.6%                | 3.7%                    | 1.4%                   | 3.4%                | 0.1%                              | -2.2%                           | -0.2%                        |
| MCC                              | Black | 0.274               | 0.27                    | 0.26                   | 0.171               | -0.4%                             | -1.4%                           | -10.3%                       |
|                                  | White | 0.236               | 0.232                   | 0.239                  | 0.14                | -0.4%                             | 0.3%                            | -9.6%                        |

|                                        |              |         |         |         |         |         |         |         |
|----------------------------------------|--------------|---------|---------|---------|---------|---------|---------|---------|
|                                        | <b>Bias</b>  | 3.8%    | 3.8%    | 2.1%    | 3.1%    | 0.0%    | -1.7%   | -0.7%   |
| <b>Brier score</b>                     | <b>Black</b> | 0.0309  | 0.0308  | 0.0309  | 0.0339  | 0.0001  | 0.0000  | 0.0030  |
|                                        | <b>White</b> | 0.0306  | 0.0306  | 0.0306  | 0.0335  | 0.0000  | 0.0000  | 0.0029  |
|                                        | <b>Bias</b>  | -0.0003 | -0.0002 | -0.0003 | -0.0004 | 0.0001  | 0.0000  | -0.0001 |
| <b>Harrel's C</b>                      | <b>Black</b> | 0.8546  | 0.833   | 0.8334  | 0.7614  | -0.0216 | -0.0212 | -0.0932 |
|                                        | <b>White</b> | 0.8335  | 0.8545  | 0.8546  | 0.7867  | 0.021   | 0.0211  | -0.0468 |
|                                        | <b>Bias</b>  | 0.0211  | -0.0215 | -0.0212 | -0.0253 | 0.0426  | 0.0423  | 0.0464  |
| <b>Equal Opportunity<sup>a</sup></b>   |              | 1.01    | 1.01    | 1.06    | 0.86    | 0.0%    | 5.0%    | -15.0%  |
| <b>Predictive Equality<sup>b</sup></b> |              | 1.05    | 1.05    | 1       | 1.2     | 0.0%    | -5.0%   | 15.0%   |

<sup>a</sup>Ratio of Sensitivity between Black and White cases – ratio higher than 1 suggests better sensitivity in Black patients than White, ratio less than 1 suggests better sensitivity in White patients than Black

<sup>b</sup>Ratio of Specificity between Black and White cases – ratio higher than 1 suggest better specificity in Black patients than White, ratio less than 1 suggests better specificity in White patients than Black

For comparisons of racial bias,  indicates metrics with better performance among Black patients than White, while  indicates metrics with better performance among White patients than Black.

For comparisons of various RAI versions,  indicates improvements in predictive performance, while  indicates reductions in predictive performance.

**Abbreviations: RAI, Risk Analysis Index; MCC, Matthew's correlation coefficient**

**Supplemental Table 2. Measures of Predictive Performance between Black and White cases for the threshold of detectable frailty (NSQIP, RAI 30, 2.3% predicted 30-day mortality)**

|                                         |              | <b>RAI<sub>Base</sub></b> |
|-----------------------------------------|--------------|---------------------------|
|                                         |              | <b>Statistic</b>          |
| <b>Accuracy</b>                         | <b>Black</b> | 0.921                     |
|                                         | <b>White</b> | 0.906                     |
|                                         | <b>Bias</b>  | 1.5%                      |
| <b>Balanced Accuracy</b>                | <b>Black</b> | 0.73                      |
|                                         | <b>White</b> | 0.733                     |
|                                         | <b>Bias</b>  | -0.3%                     |
| <b>True Positive Rate (Sensitivity)</b> | <b>Black</b> | 0.534                     |
|                                         | <b>White</b> | 0.557                     |
|                                         | <b>Bias</b>  | -2.3%                     |
| <b>True Negative Rate (Specificity)</b> | <b>Black</b> | 0.925                     |
|                                         | <b>White</b> | 0.91                      |
|                                         | <b>Bias</b>  | 1.5%                      |
| <b>False Positive Rate</b>              | <b>Black</b> | 0.075                     |
|                                         | <b>White</b> | 0.09                      |
|                                         | <b>Bias</b>  | 1.5%                      |
| <b>False Negative Rate</b>              | <b>Black</b> | 0.466                     |
|                                         | <b>White</b> | 0.443                     |
|                                         | <b>Bias</b>  | -2.3%                     |
| <b>F1 score</b>                         | <b>Black</b> | 0.119                     |
|                                         | <b>White</b> | 0.108                     |
|                                         | <b>Bias</b>  | 1.1%                      |
| <b>MCC</b>                              | <b>Black</b> | 0.169                     |
|                                         | <b>White</b> | 0.16                      |
|                                         | <b>Bias</b>  | 0.9%                      |

|                                        |              |        |
|----------------------------------------|--------------|--------|
| <b>Brier score</b>                     | <b>Black</b> | 0.0095 |
|                                        | <b>White</b> | 0.0097 |
|                                        | <b>Bias</b>  | 0.0002 |
| <b>Harrel's C</b>                      | <b>Black</b> | 0.8544 |
|                                        | <b>White</b> | 0.8476 |
|                                        | <b>Bias</b>  | 0.0068 |
| <b>Equal Opportunity<sup>a</sup></b>   |              | 0.96   |
| <b>Predictive Equality<sup>b</sup></b> |              | 1.02   |

<sup>a</sup>Ratio of Sensitivity between Black and White cases – ratio higher than 1 suggests better sensitivity in Black patients than White, ratio less than 1 suggests better sensitivity in White patients than Black

<sup>b</sup>Ratio of Specificity between Black and White cases – ratio higher than 1 suggest better specificity in Black patients than White, ratio less than 1 suggests better specificity in White patients than Black

For comparisons of racial bias,  indicates metrics with better performance among Black patients than White, while  indicates metrics with better performance among White patients than Black.

For comparisons of various RAI versions,  indicates improvements in predictive performance, while  indicates reductions in predictive performance.

**Abbreviations: RAI, Risk Analysis Index; MCC, Matthew's correlation coefficient**

**Supplemental Figure 1. Comparison of ROC curves between Black and White cases in the RAI<sub>Base</sub> (NSQIP)**

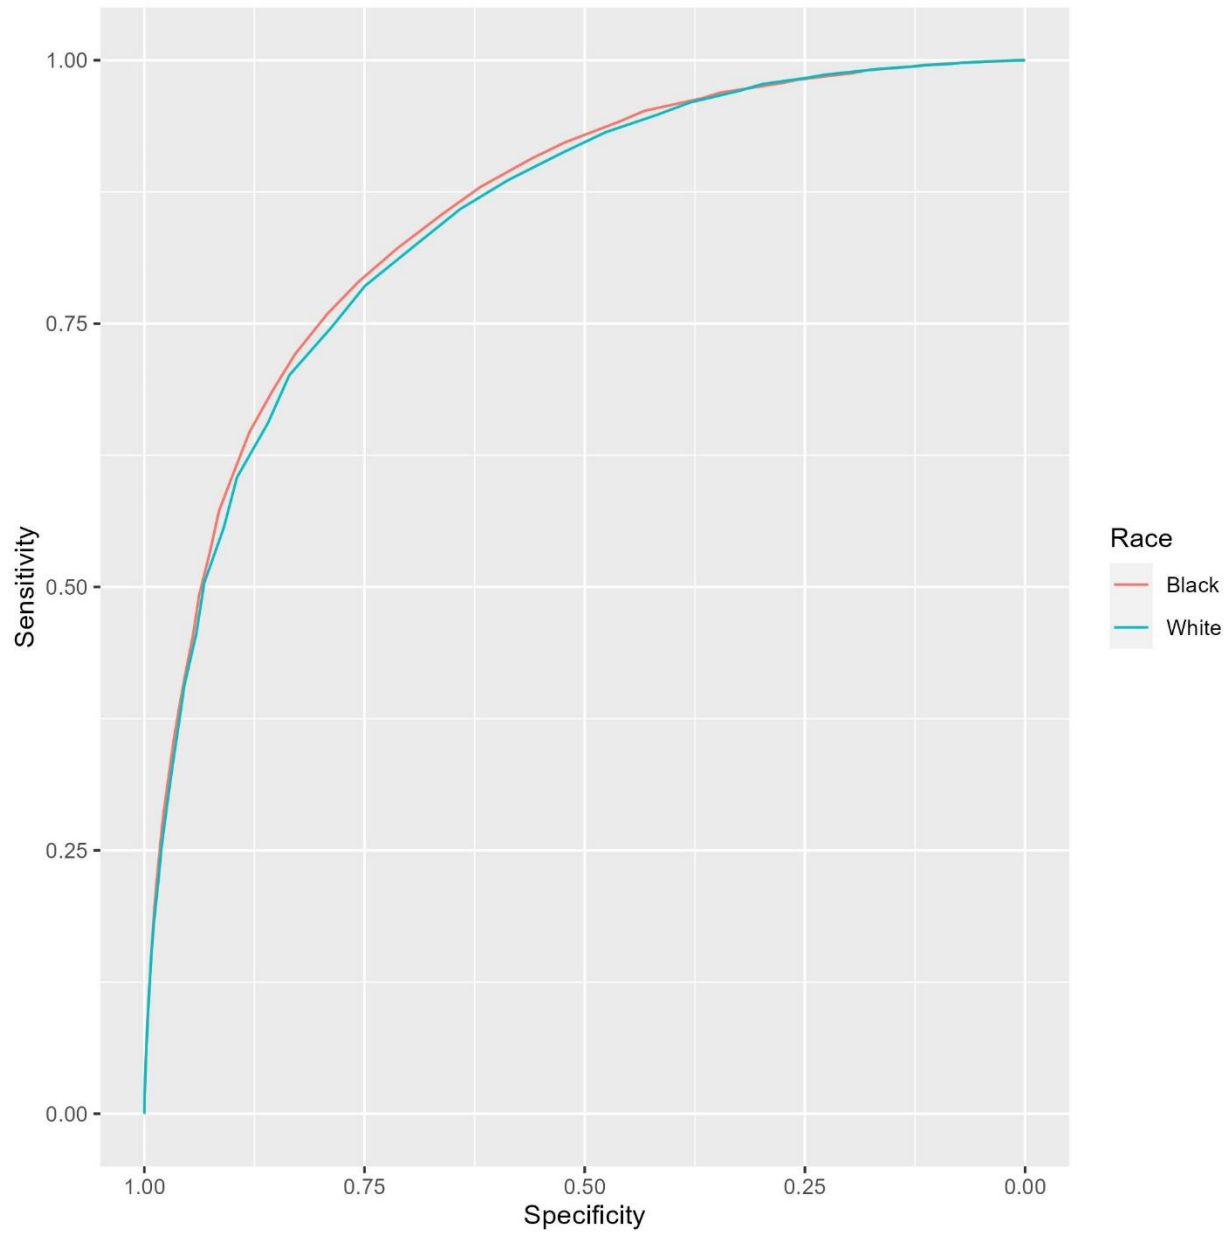

Supplement: as9-5-e490-s001.pdf [file as9-5-e490-s001.pdf]
